# Supplementary material for: Discovery of Novaculina myanmarensis sp. nov. (Bivalvia: Pharidae: Pharellinae) closes the freshwater razor clams range disjunction in Southeast Asia
Source: PubMed Central journal article supplement (PMC6218526; doi:10.1038/s41598-018-34491-8), 2018-11-05
Supplement: 41598_2018_34491_MOESM1_ESM.pdf [file 41598_2018_34491_MOESM1_ESM.pdf]

## SUPPLEMENTARY INFORMATION

# Discovery of *Novaculina myanmarensis* **sp. nov.** (Bivalvia: Pharidae: Pharellinae) closes the freshwater razor clams range disjunction in Southeast Asia

Ivan N. Bolotov\*, Ilya V. Vikhrev, Manuel Lopes-Lima, Zau Lunn, Nyein Chan, Than Win, Olga V. Aksenova, Mikhail Yu. Gofarov, Alexander V. Kondakov, Ekaterina S. Konopleva & Sakboworn Tumpeesuwan

\*Corresponding author: [inepras@yandex.ru](mailto:inepras@yandex.ru)

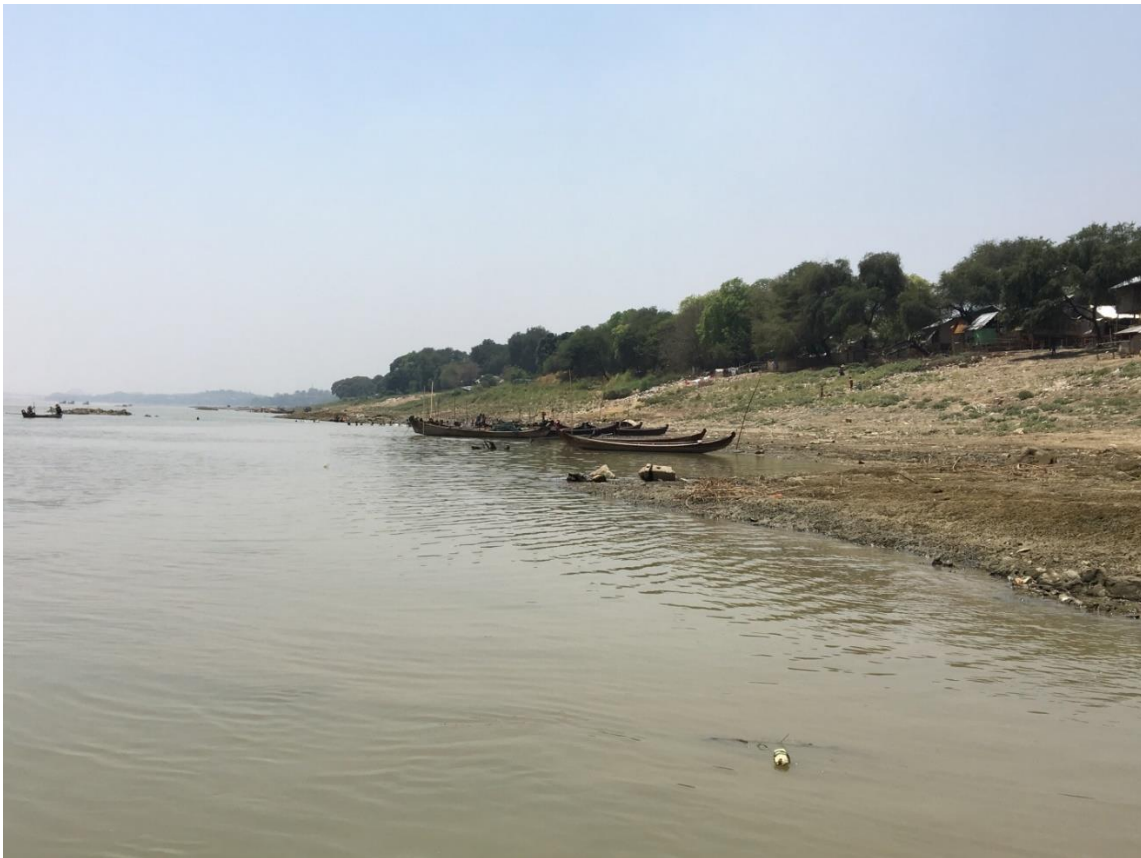

Habitat of *Novaculina myanmarensis* **sp. nov.**, Ayeyarwady River, near Minbu, 20.1911° N, 94.8788° E (Photo: Nyein Chan).

# Contents

**Supplementary Table 1.** List of additional sequences used in this study for phylogenetic reconstructions.

**Supplementary Table 2.** List of available georeferenced records of *Novaculina* species.

**Supplementary Table 3.** Models of sequence evolution for each partition based on corrected Akaike Information Criterion (AICc) of MEGA6 that were applied within Bayesian models.

**Supplementary Table 1.** List of additional sequences from GenBank used in this study for phylogenetic reconstructions. Species names and environmental preference are on the basis of the World Register of Marine Species database<sup>1</sup>.

| Taxa                                                                                  | Environment | Locality              | COI      | 16S rRNA | 28S rRNA |
|---------------------------------------------------------------------------------------|-------------|-----------------------|----------|----------|----------|
| <i>Sinonovacula constricta</i> (Lam., 1818)                                           | Marine      | China                 | JN859986 | JN859901 | AF131005 |
| <i>S. mollis</i> (G. B. Sowerby II, 1874) (= <i>S. rivularis</i> Huang & Zhang, 2007) | Marine      | China                 | JN859994 | JN859908 | n/a      |
| <i>Pharella javanica</i> (Lam., 1818)                                                 | Marine      | Thailand              | n/a      | n/a      | AM779683 |
| <i>Cultellus attenuatus</i> Dunker, 1862                                              | Marine      | China                 | JN859998 | JN859913 | n/a      |
| <i>Ensiculus cultellus</i> (L., 1758)                                                 | Marine      | Queensland, Australia | n/a      | n/a      | AM779682 |
| <i>Pharus legumen</i> (L., 1758)                                                      | Marine      | South Wales, UK       | n/a      | n/a      | AM779684 |
| <i>Phaxas pellucidus</i> (Pennant, 1777)                                              | Marine      | Sweden, Tjörnö        | KC429145 | KC429309 | KC429508 |
| <i>Ensis magnus</i> Schumacher, 1817*                                                 | Marine      | Ireland & Spain**     | EU523690 | AJ586445 | n/a      |
| <i>E. leei</i> Huber, 2015*                                                           | Marine      | Europe & USA**        | EU523673 | HF970450 | JF909603 |
| <i>E. macha</i> (Molina, 1782)*                                                       | Marine      | Chile**               | JF301780 | HF970471 | n/a      |
| <i>Siliqua alta</i> (Broderip & Sowerby, 1829)*                                       | Marine      | Hokkaido, Japan       | n/a      | AB751362 | AB746908 |
| <i>S. radiata</i> (Linnaeus, 1758)*                                                   | Marine      | China                 | JN860004 | JN859917 | n/a      |

\*Outgroup taxa. \*\*Chimeric sequence. n/a – not available.

**Supplementary Table 2.** List of available georeferenced records of *Novaculina* species

| Species                         | Locality                                                               | Latitude | Longitude | Reference                 |
|---------------------------------|------------------------------------------------------------------------|----------|-----------|---------------------------|
| <i>N. myanmarensis</i> sp. nov. | Myanmar: downstream of Donthami River                                  | 16.6935  | 97.5819   | This study (RMBH)         |
| <i>N. myanmarensis</i> sp. nov. | Myanmar: Ayeyarwady River, Pakokku Region, near Thin Baw Kone village* | 21.3146  | 95.0591   | This study (RMBH)         |
| <i>N. myanmarensis</i> sp. nov. | Myanmar: Ayeyarwady River, large sandbar 0.5 mi SE of Nyaung-U         | 21.2066  | 94.9062   | This study (CAS)          |
| <i>N. myanmarensis</i> sp. nov. | Myanmar: Ayeyarwady River, near Minbu                                  | 20.1911  | 94.8788   | This study (FFI)          |
| <i>N. gangetica</i>             | India: Ganges River at Vindhyachal upstream of Mirzapur                | 25.1666  | 82.5072   | Ref. 5                    |
| <i>N. gangetica</i>             | India: Hooghly River downstream of Howra                               | 22.4278  | 88.1368   | Ref. 5                    |
| <i>N. gangetica</i>             | India: Ganges River at Varanasi                                        | 25.3279  | 83.0464   | Ref. 6                    |
| <i>N. gangetica</i>             | India: Ganges River at Patna                                           | 25.6589  | 85.1573   | Ref. 7                    |
| <i>N. gangetica</i>             | India: Calcutta*                                                       | 22.6000  | 88.3000   | MCZ 224805; UMZC I.102125 |
| <i>N. gangetica</i>             | India: Jumna [Yamuna] River at Hamirpur                                | 25.9617  | 80.1525   | Ref. 8                    |
| <i>N. gangetica</i>             | India: Gomti River at Jaunpur                                          | 25.7474  | 82.6874   | Ref. 8                    |
| <i>N. gangetica</i>             | India: Burhi Gandak River at Khagaria                                  | 25.5009  | 86.4776   | Ref. 9                    |
| <i>N. gangetica</i>             | Bangladesh: Turag River at Tangi Bridge                                | 23.8997  | 90.4081   | Ref. 10                   |
| <i>N. gangetica</i>             | Bangladesh: Moyur River                                                | 22.7719  | 89.5402   | Ref. 11                   |
| <i>N. gangetica</i>             | Myanmar: Kaladan River                                                 | 21.0094  | 92.9813   | Ref. 12                   |
| <i>N. gangetica</i>             | Myanmar: Lemro River                                                   | 20.6150  | 93.2481   | Ref. 12                   |
| <i>N. siamensis</i>             | Thailand: Chantakam [Bang Pakong River basin]*                         | 14.0000  | 102.0000  | Ref. 2                    |
| <i>N. siamensis</i>             | Thailand: Pa Sak River near Saraburi                                   | 14.5304  | 100.9113  | Ref. 3                    |
| <i>N. siamensis</i>             | Vietnam: Ba Lai River, Mekong Delta                                    | 10.2647  | 106.4397  | Ref. 4                    |
| <i>N. chinensis</i>             | China: Lake Taihu, Wuxi*                                               | 31.4402  | 120.3143  | Ref. 13, 14               |
| <i>N. chinensis</i>             | China: Lake Taihu, southwest                                           | 31.1843  | 120.4267  | Ref. 15                   |
| <i>N. chinensis</i>             | China: Lake Hongze                                                     | 33.3075  | 118.7100  | Ref. 16                   |
| <i>N. chinensis</i>             | China: Lake Chaohu                                                     | 31.5224  | 117.5616  | Ref. 17                   |
| <i>N. chinensis</i>             | China: Yintan                                                          | 28.0333  | 117.0667  | Ref. 18                   |

\*Type locality (see Taxonomic Account for details).

**Supplementary Table 3.** Models of sequence evolution for each partition based on corrected Akaike Information Criterion (AICc) of MEGA6<sup>19</sup> that were applied within Bayesian models

| Data set and partition              | Model   | Gamma | Invariant |
|-------------------------------------|---------|-------|-----------|
| 1 <sup>st</sup> codon of <i>COI</i> | TN93+G  | 0.10  | n/a       |
| 2 <sup>nd</sup> codon of <i>COI</i> | HKY+G   | 0.05  | n/a       |
| 3 <sup>rd</sup> codon of <i>COI</i> | HKY+G   | 0.87  | n/a       |
| 16S <i>rRNA</i>                     | GTR+G+I | 0.40  | 0.51      |
| 28S <i>rRNA</i>                     | GTR+G+I | 7.15  | 0.58      |

n/a – not available.

## Supplementary references

1. *World Register of Marine Species* <http://marinespecies.org> (2018).
2. Morlet, L. Catalogue des Coquilles recueillies, par M. Pavie, dans le Cambodge et le Royaume de Siam, et description d'espèce nouvelles. *Journal de Conchyliologie* **37**, 121–199 (1889).
3. Brandt, R. A. M. The non-marine aquatic mollusca of Thailand. *Archiv für Mollusckenkunde* **105**, 1–423 (1974).
4. Sayenko, E.M., Quang, N.X. & Lutaenko, K.A. Bivalves of the Ba Lai River – one of estuary of the Mekong Delta, Vietnam. in *Life-Supporting Asia-Pacific Marine Ecosystems, Biodiversity and Their Functioning* (ed. Dautova, T.N, Sun, X., Sun, S. & Adrianov, A.V.) 178–184 (Science Press Beijing, 2017).
5. Neemann, H. A., Sharma, S. U., Sharma, G. O. & Sinha, R. K. Illustrated checklist of large freshwater bivalves of the Ganga river system (Mollusca: Bivalvia: Solecurtidae, Unionidae, Amblemidae). *Nachrichtenblatt der Ersten Vorarlberger Malakologischen Gesellschaft* **13**, 1–51 (2005).
6. Subba Rao, N.V. *Handbook of freshwater molluscs of India* (Calcutta, 1989).
7. Neemann, H., Sharma, G. & Sinha, R. Benthic macro-invertebrate fauna and “marine elements” sensu Annandale (1922) highlight the valuable dolphin habitat of river Ganga in Bihar-India. *Taprobanica* **3**, 18–30; DOI:10.4038/tapro.v3i1.3230 (2011).
8. Benson, W.H. Characters of *Tanysiphon*, a new genus of fluviatile shells, allied to Myacidae. *Annals and Magazine of Natural History (3rd series)* **1**, 407–410 (1858).
9. Prabhakar, A. K. & Roy, S. P. Taxonomic diversity of shell fishes of Kosi Region of North-Bihar (India). *The Ecscan* **2**, 149–156 (2008).
10. Baki, M. A., Hossain, M. M. & Bhuiyan, N. A. Checklist of freshwater mollusca (Gastropoda and Bivalvia) recorded from the Buriganga and Turag rivers, Dhaka, Bangladesh. *The Festivus* **48**, 221–228 (2016).

11. Khan, A. N., Kamal, D., Mahmud, M. M., Rahman, M. A. & Hossain, M. A. Diversity, distribution and abundance of benthos in Mouri River, Khulna, Bangladesh. *International Journal of Sustainable Crop Production* **2**, 19–23 (2007).
12. Bolotov, I. N. et al. Discovery of a silicate rock-boring organism and macrobioerosion in fresh water. *Nature Communications* **9**, 2882; DOI:10.1038/s41467-018-05133-4 (2018).
13. Liu, Y. Y. & Zhang, W. Z. A new species of freshwater razor clam, *Novaculina chinensis*, from Jiangsu Province, China. *Acta Zootaxonomica Sinica* **4**, 356–357 (1979).
14. Qin, B. (Ed.). Lake Taihu, China: Dynamics and environmental change. *Monographiae Biologicae* **87**, 1–348 (2008).
15. Ji, L., Song, C., Cao, X., Zhou, Y. & Deng, D. Spatial variation in nutrient excretion by macrozoobenthos in a Chinese large shallow lake (Lake Taihu). *Journal of Freshwater Ecology* **30**, 169–180; DOI:10.1080/02705060.2014.997816 (2015).
16. Hu, Z., Sun, X., Cai, Y., Guo, L., Chen, Q., Liu, T., Shi, F. & Yang, L. The habitat type and trophic state determine benthic macroinvertebrate communities in lowland shallow lakes of China. *Journal of Limnology* **75**, 330–339; DOI:10.4081/jlimnol.2016.1220 (2016).
17. Cai, Y., Gong, Z. & Xie, P. Community structure and spatiotemporal patterns of macrozoobenthos in Lake Chaohu (China). *Aquatic Biology* **17**, 35–46; DOI:10.3354/ab00455 (2012).
18. Wen, C. & Zhu, Z. Seven species of water mites in the genus *Unionicola* from Jiangxi (Acari: Unionicolidae). *Acta Zootaxonomica Sinica* **24**, 30–37 (1999).
19. Tamura, K., Stecher, G., Peterson, D., Filipski, A. & Kumar, S., MEGA6: Molecular Evolutionary Genetics Analysis version 6.0. *Molecular Biology and Evolution* **30**, 2725–2729; DOI:10.1093/molbev/mst197 (2013).
